# Supplementary material for: Design of Oligonucleotide Carriers: Importance of Polyamine Chain Length
Source: MDPI journal article supplement (doi:10.3390/polym10121297), 2018-11-23
Supplement: s1 [file s1]

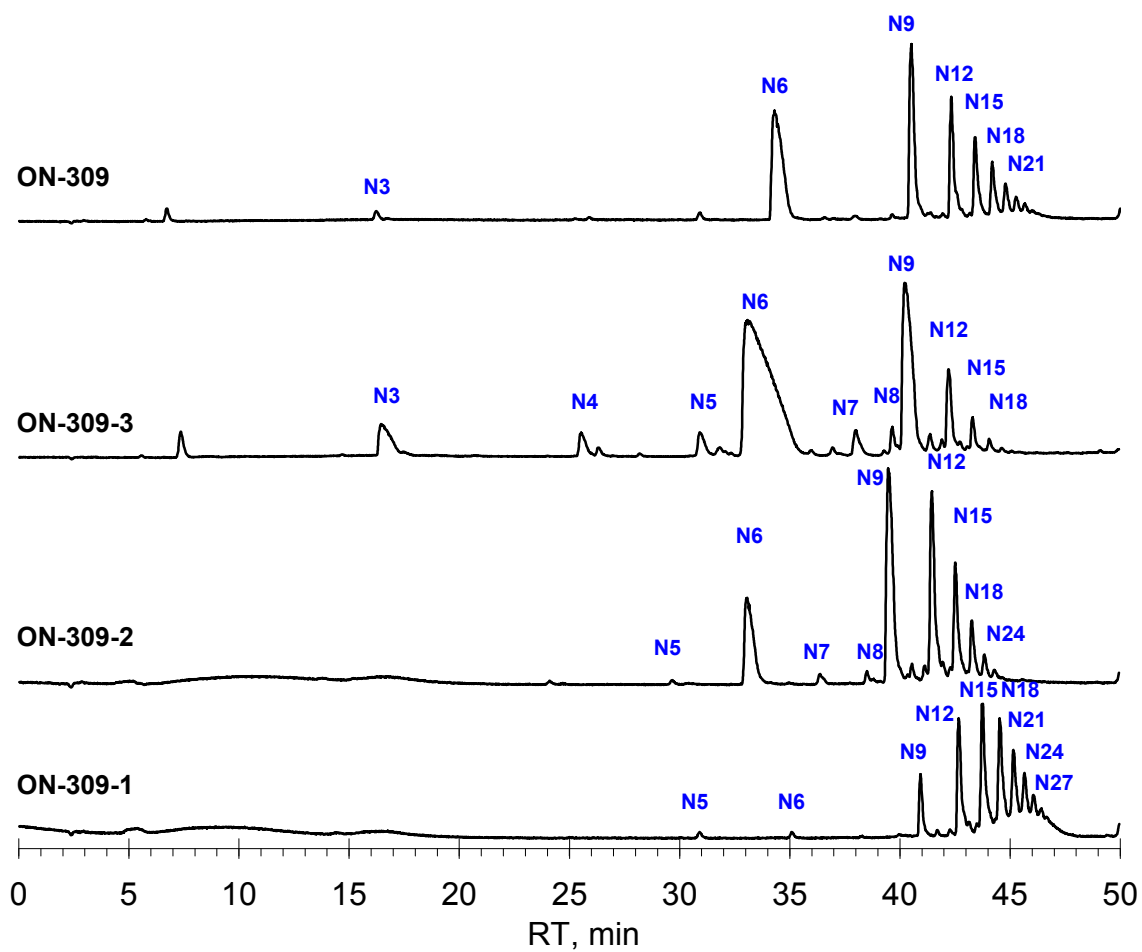

**Figure S1.** Liquid chromatography-mass spectrometry (LC-MS) analysis of ZS-309 fractions, isocratic elution with 0.1% solution of HFBA in water (A) and 0.1 % solution of HFBA in acetonitrile (B) (90% A / 10% B, sample concentration 50 mg·L<sup>-1</sup>).

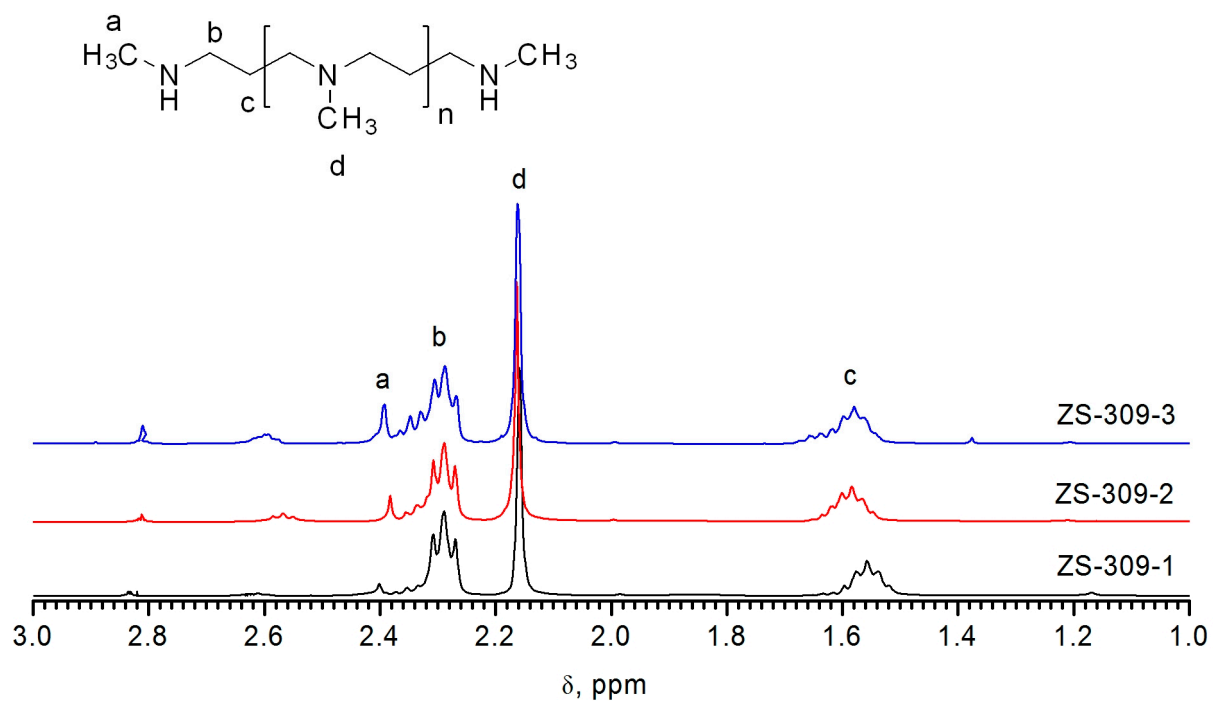

Figure S2.  $^1\text{H}$  NMR spectra of LCPA (ZS-309) fractions.

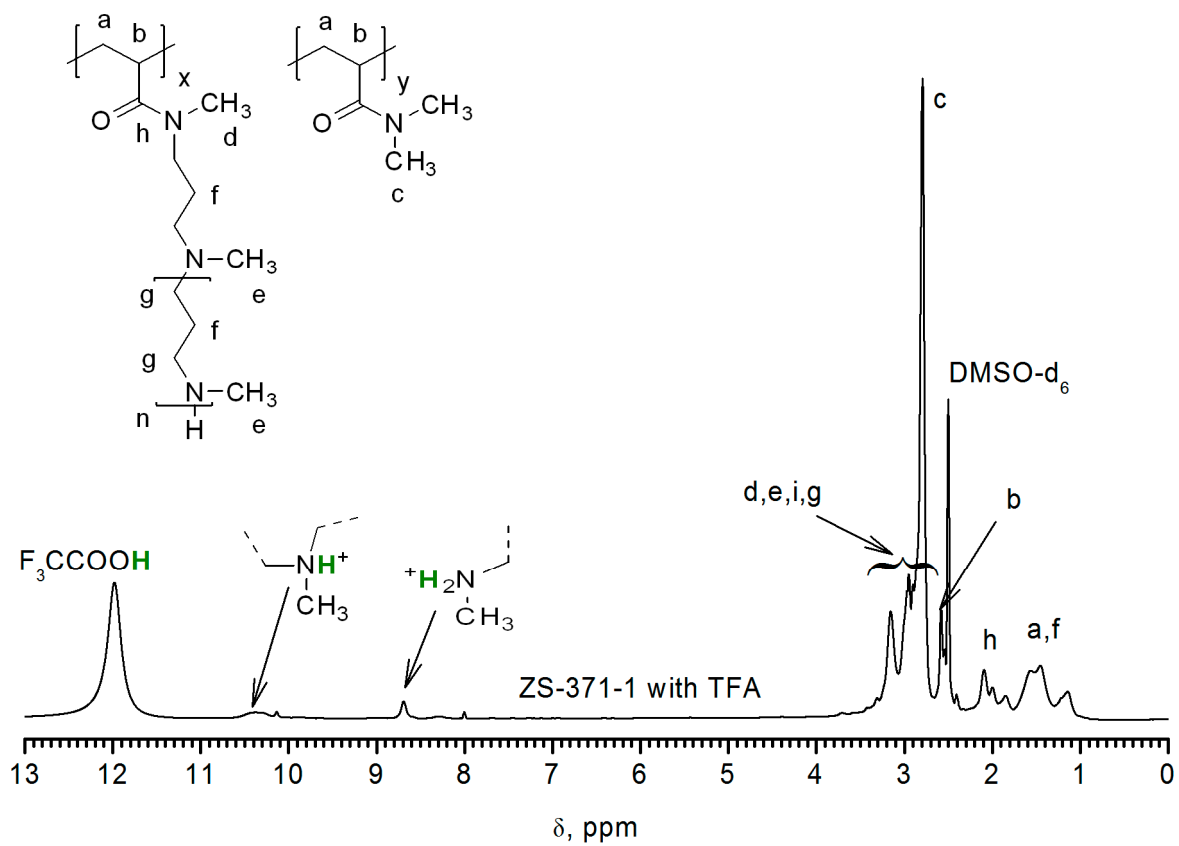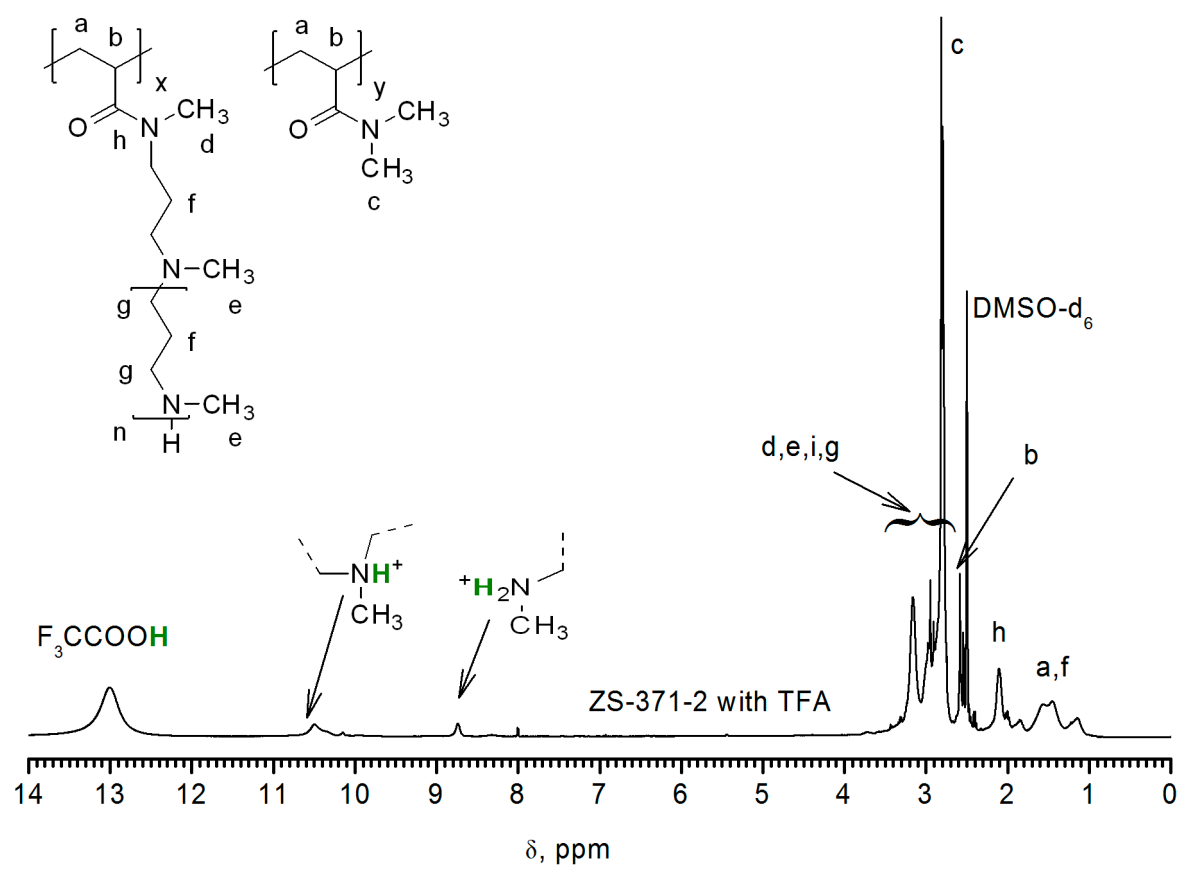

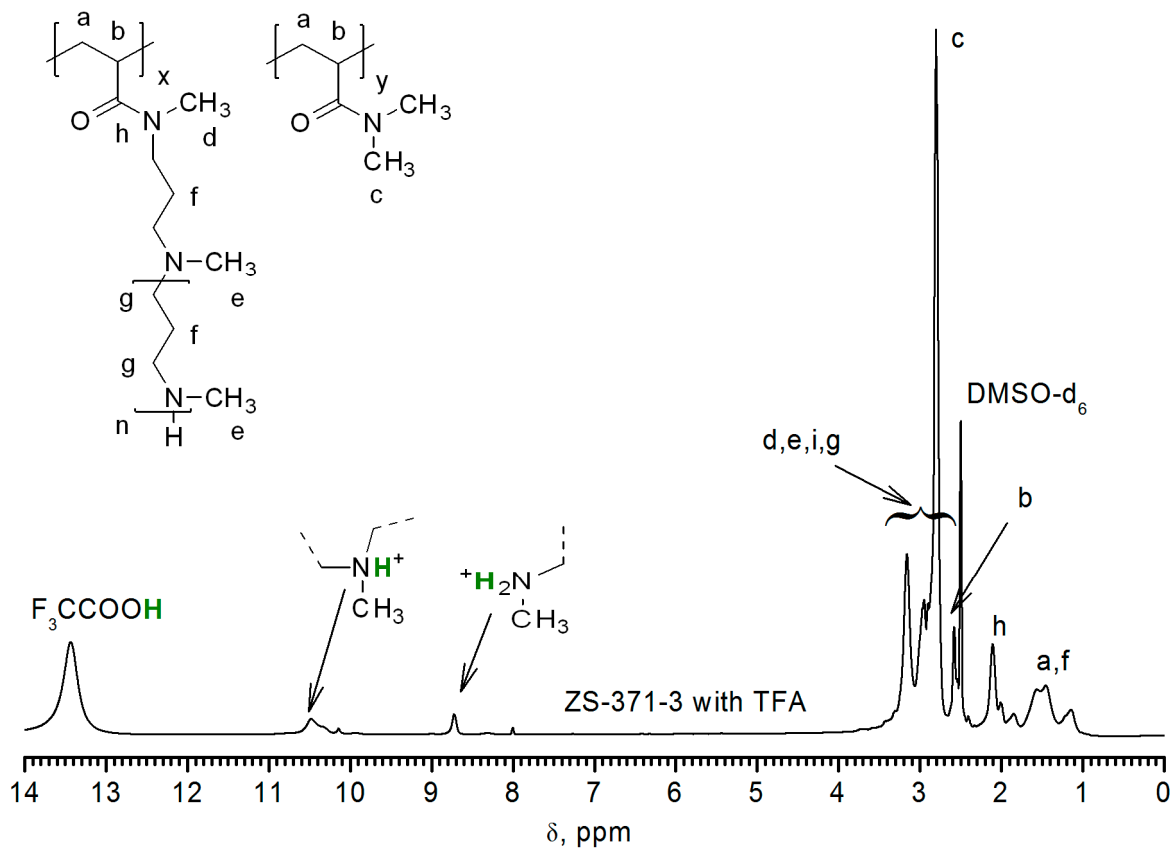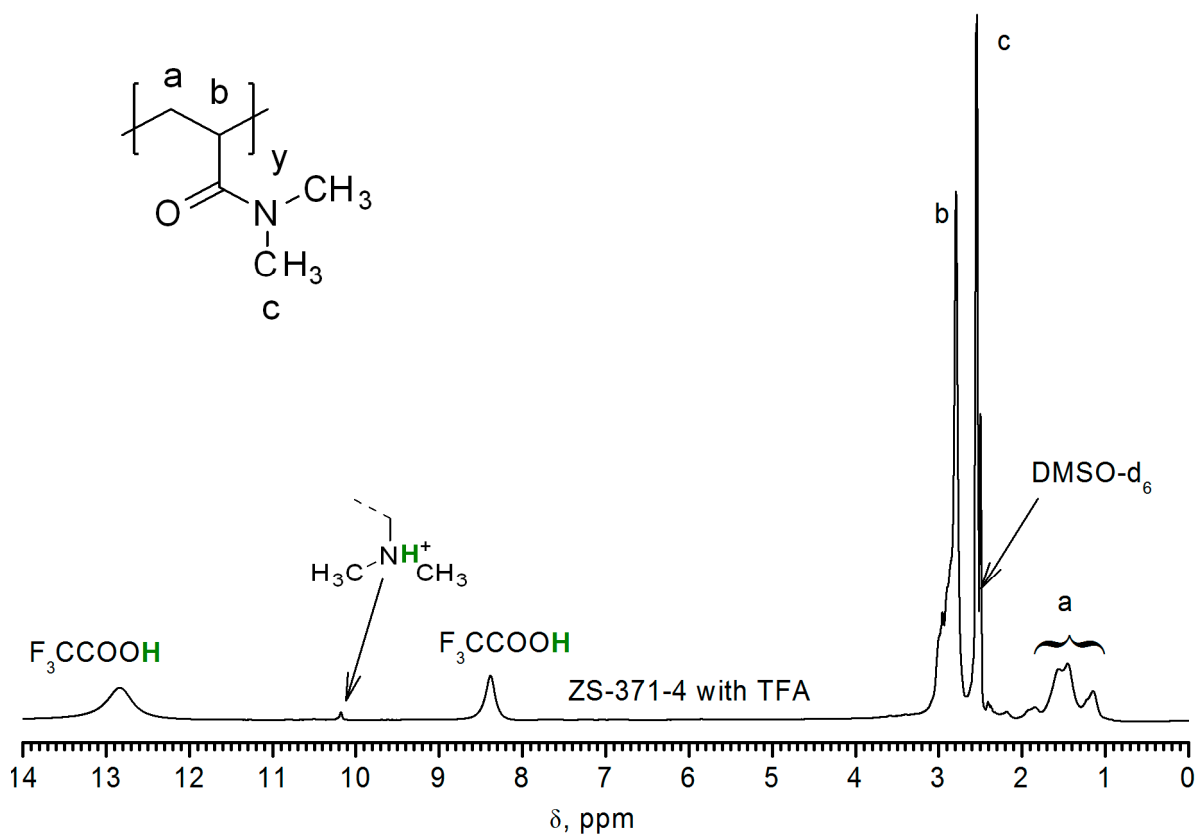

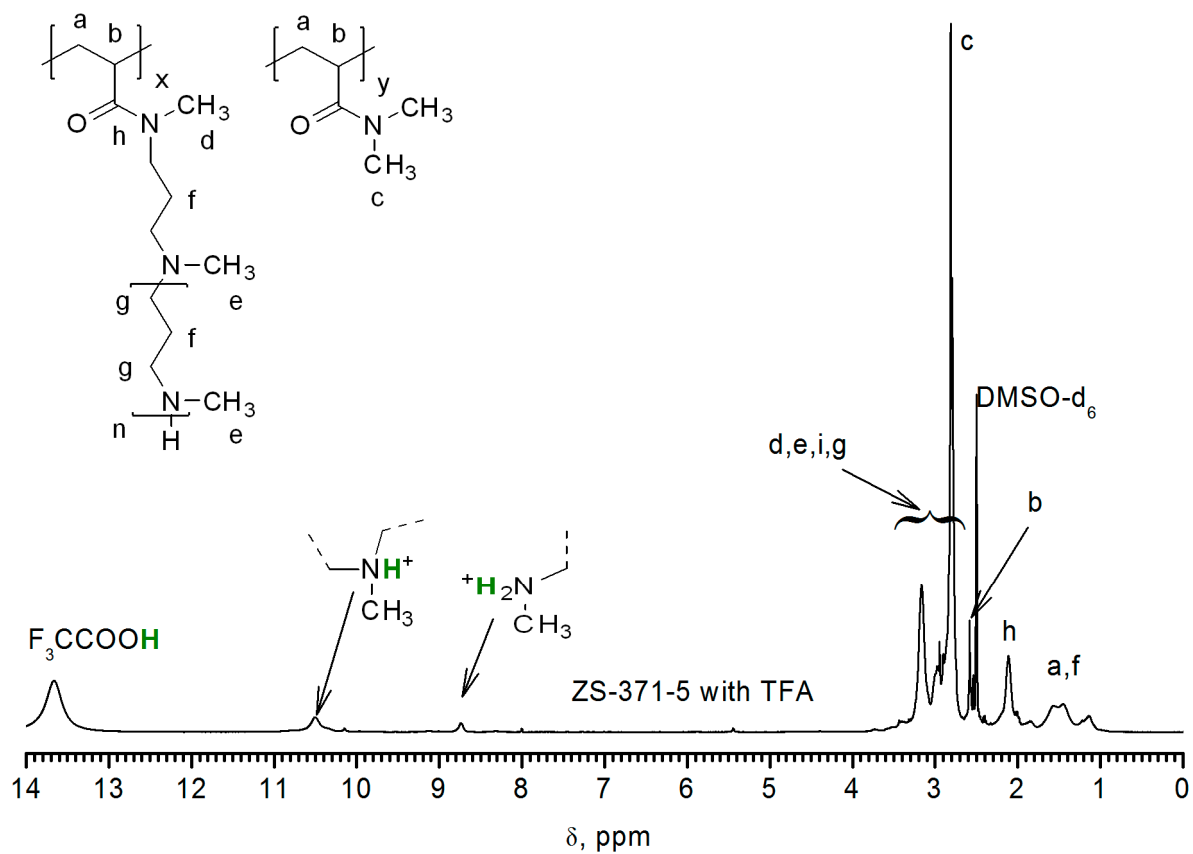

**Figure S3.**  $^1\text{H}$  NMR spectra of copolymers (derivatized with TFA) in  $\text{DMSO-d}_6$ .
